# Supplementary material for: High Catalytic Efficiency of a Nanosized Copper-Based Catalyst for Automotives: A Physicochemical Characterization
Source: MDPI journal article supplement (doi:10.3390/molecules27217402), 2022-10-31
Supplement: s1 [file s1]

## Supplementary Material

### High catalytic efficiency of nanosized copper-based catalyst for automotive: A physicochemical characterization

Amaia Soto Beobide <sup>1,\*</sup>, Anastasia M. Moschovi <sup>2</sup>, Georgios N. Mathioudakis <sup>1</sup>, Marios Kourtelesis <sup>2</sup>, Zoi G. Lada <sup>1</sup>, Konstantinos S. Andrikopoulos <sup>1,3</sup>, Labrini Sygellou <sup>1</sup>, Vassilios Dracopoulos <sup>1</sup>, Iakovos Yakoumis <sup>2,\*</sup> and George A. Voyiatzis <sup>1</sup>

**Table S1:** Measured copper and palladium loading from SEM-EDX mapping analysis of the PROM100 fresh and aged samples.

| % w concentration ( $\pm 1.5\%$ ) |                    |                    |       |
|-----------------------------------|--------------------|--------------------|-------|
| Samples                           | Cu ( $\pm 0.2\%$ ) | Pd ( $\pm 0.1\%$ ) | Cu:Pd |
| PROM100-fresh                     | 1.44               | 0.38               | 3.8   |
| PROM100-aged                      | 0.51               | 0.32               | 1.6   |

Ce3d and Zr3d XPS spectra of the fresh and aged CZ support and PROM100 catalysts

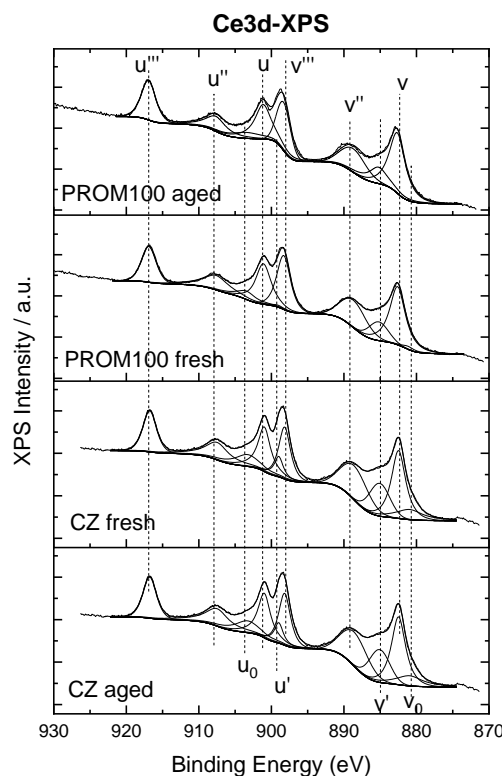

**Figure S1:** Deconvoluted Ce3d XP Spectra of CZ support material and PROM100 fresh and aged catalysts.

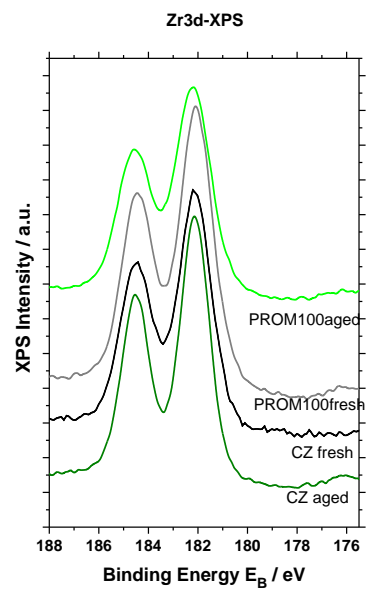

**Figure S2:** Zr3d XP Spectra of CZ support material and PROM100 fresh and aged catalysts.
